# Supplementary material for: Channel cross-section heterogeneity of particulate organic carbon transport in the Huanghe
Source: Copernicus journal article supplement (doi:10.5194/esurf-12-347-2024), 2024-02-15
Supplement: Supplementary file 1 [file Table_S1.xlsx]

## Sheet: Sheet1
Table. S1 Elemental and isotopic composition of POC in the Huanghe,
	with results from the mixing model.
Code	Location	Type	Sample date	TSM	POC	δ13C	∆14C	Fm	14C	OCts	SD	OClps	SD	OCpetro	SD	Fmbio	OCbio	Reference
				(mg/L)	(%)	(‰)	(‰)		age								age
JB 1-1	Luokou	SPM	2016-07-17	678.8	0.44	-25.8	-360	0.65	3527	0.524	0.089	0.368	0.089	0.108	0.043	0.7287	2542.39	This study
JB 1-2	Luokou	SPM	2016-07-17	756.6	0.45	-25.8	-392	0.61	3929	0.499	0.084	0.386	0.089	0.115	0.046	0.689266	2989.31	This study
JB 1-3	Luokou	SPM	2016-07-17	1095.1	0.39	-26.1	-331	0.68	3161	0.554	0.095	0.345	0.093	0.101	0.042	0.756396	2242.74	This study
JB 2-1	Luokou	SPM	2016-07-17	729.6	0.4	-26	-374	0.63	3703	0.518	0.086	0.371	0.089	0.111	0.045	0.708661	2766.38	This study
JB 2-2	Luokou	SPM	2016-07-17	1124.5	0.32	-26.4	-436	0.57	4537	0.478	0.077	0.388	0.088	0.134	0.054	0.658199	3359.79	This study
JB 2-3	Luokou	SPM	2016-07-17	1805.7	0.29	-26.5	-453	0.55	4779	0.466	0.075	0.394	0.09	0.139	0.06	0.638792	3600.2	This study
JB 3-1	Luokou	SPM	2016-07-17	1058	0.32	-26.1	-422	0.58	4346	0.482	0.078	0.395	0.09	0.124	0.052	0.6621	3312.31	This study
JB 3-2	Luokou	SPM	2016-07-17	2458.7	0.31	-26.6	-415	0.59	4247	0.498	0.077	0.373	0.088	0.128	0.052	0.676606	3138.23	This study
JB 4-1	Luokou	SPM	2016-07-17	1747.3	0.41	-25.7	-375	0.63	3714	0.511	0.087	0.379	0.09	0.11	0.045	0.707865	2775.41	This study
JB 5-1	Luokou	SPM	2016-07-17	1406.1	0.32	-26.1	-416	0.59	4256	0.487	0.08	0.388	0.09	0.124	0.052	0.673516	3174.99	This study
HH 17.05	Luokou	SPM	2017-05-01	82.6	0.92	-25.7	-295	0.71	2740	0.575	0.107	0.333	0.099	0.093	0.039	0.7828	1967.1	This study
HH 17.06	Luokou	SPM	2017-06-01	54.2	1.21	-25.6	-277	0.73	2539	0.585	0.112	0.326	0.102	0.089	0.038	0.801317	1779.3	This study
Lijin	Lijin	SPM	2013-06-26	6800	0.35	-22.6	-642	0.36	8249	0.294	0.096	0.609	0.115	0.097	0.044	0.398671	7387.3	Hu et al. (2015)
Lijin	Lijin	SPM	2013-06-30	5000	0.4	-23.3	-638	0.36	8169	0.298	0.093	0.595	0.112	0.107	0.048	0.403135	7297.84	Hu et al. (2015)
Lijin	Lijin	SPM	2013-07-02	5600	0.43	-22.7	-676	0.32	9041	0.277	0.096	0.625	0.117	0.098	0.046	0.354767	8324.55	Hu et al. (2015)
Lijin	Lijin	SPM	2013-07-06	5500	0.46	-23	-681	0.32	9181	0.277	0.093	0.62	0.114	0.103	0.047	0.356745	8279.89	Hu et al. (2015)
Lijin	Lijin	SPM	2013-07-10	15900	0.47	-24.2	-588	0.41	7119	0.333	0.087	0.544	0.104	0.123	0.055	0.467503	6107.89	Hu et al. (2015)
Lijin	Lijin	SPM	2013-07-12	13100	0.55	-23.9	-553	0.45	6459	0.35	0.088	0.531	0.104	0.118	0.052	0.510204	5405.76	Hu et al. (2015)
Lijin	Lijin	SPM	2014-06-22		0.28	-23.8	-454	0.55	4799	0.417	0.088	0.475	0.1	0.108	0.046	0.616592	3884.34	Ge et al. (2020)
Lijin	Lijin	SPM	2014-07-01		0.29	-22.8	-469	0.54	5023	0.403	0.095	0.499	0.109	0.097	0.043	0.598007	4130.19	Ge et al. (2020)
Lijin	Lijin	SPM	2014-07-04		0.27	-23.5	-473	0.53	5083	0.404	0.089	0.491	0.102	0.105	0.046	0.592179	4208.86	Ge et al. (2020)
HYK	Huayuankou	SPM	2014-07-05		0.3	-23.7	-470	0.53	5038	0.404	0.088	0.488	0.102	0.108	0.047	0.59417	4181.89	Ge et al. (2020)
HYK	Huayuankou	SPM	2014-07-06		0.32	-23.3	-508	0.5	5635	0.375	0.09	0.518	0.107	0.107	0.046	0.55991	4658.97	Ge et al. (2020)
HYK	Huayuankou	SPM	2014-07-09		0.29	-24.6	-491	0.51	5363	0.401	0.082	0.477	0.096	0.122	0.052	0.580866	4363.81	Ge et al. (2020)
HYK	Huayuankou	SPM	(05-06)/2015		0.25	-24.1	-425	0.58	4380	0.444	0.09	0.449	0.099	0.107	0.045	0.649496	3466.71	Xue et al. (2017)
Jinan	Jinan	SPM	(05-06)/2016		0.29	-23.8	-471	0.53	5060	0.406	0.088	0.486	0.102	0.108	0.045	0.59417	4181.89	Xue et al. (2017)
Lijin	Lijin	SPM	2011-06-28	1420	0.4	-23.8	-419	0.59	4303	0.443	0.092	0.454	0.1	0.103	0.043	0.657748	3365.29	Tao et al. (2015)
Lijin	Lijin	SPM	2011-09-22	2850	0.33	-24.2	-415	0.59	4248	0.45	0.089	0.444	0.097	0.106	0.043	0.659955	3338.38	Tao et al. (2015)
Lijin	Lijin	SPM	2011-11-17	620	0.45	-24	-400	0.6	4044	0.46	0.092	0.438	0.099	0.102	0.043	0.668151	3239.23	Tao et al. (2015)
Lijin	Lijin	SPM	2012-01-13	810	0.32	-23.9	-408	0.6	4151	0.452	0.093	0.445	0.1	0.103	0.043	0.668896	3230.28	Tao et al. (2015)
Lijin	Lijin	SPM	2012-04-22	400	0.47	-24.2	-443	0.56	4641	0.43	0.087	0.459	0.099	0.111	0.045	0.629921	3712.53	Tao et al. (2015)
Lijin	Lijin	SPM	2012-06-19	980	0.27	-24	-397	0.61	4003	0.462	0.091	0.436	0.098	0.103	0.042	0.680045	3097.5	Tao et al. (2015)
Lijin	Lijin	SPM	2012-06-27	2790	0.32	-23.8	-436	0.57	4540	0.431	0.089	0.464	0.101	0.105	0.044	0.636872	3624.39	Tao et al. (2015)
HYK	Huayuankou	SPM	2015-06-09	200	0.26	-24.8	-352	0.65	3422	0.515	0.095	0.384	0.095	0.1	0.041	0.722222	2614.12	Yu et al. (2019a)
HYK	Huayuankou	SPM	2015-11-12	130	0.27	-24.5	-451	0.55	4754	0.427	0.083	0.458	0.095	0.116	0.048	0.622172	3811.97	Yu et al. (2019a)
HYK	Huayuankou	SPM	2016-01-07	170	0.34	-24.4	-390	0.61	3907	0.476	0.091	0.42	0.097	0.104	0.043	0.680804	3088.54	Yu et al. (2019a)
HYK	Huayuankou	SPM	2016-04-24	290	0.25	-24.3	-410	0.59	4174	0.458	0.088	0.436	0.095	0.107	0.043	0.660694	3329.39	Yu et al. (2019a)
Kenli	Kenli	SPM	2015-04-06	1030	0.16	-23.3	-412	0.59	4203	0.445	0.095	0.456	0.105	0.098	0.041	0.654102	3409.94	Yu et al. (2019a)
Kenli	Kenli	SPM	2015-07-09	6540	0.27	-23.9	-409	0.6	4162	0.453	0.093	0.444	0.101	0.103	0.044	0.668896	3230.28	Yu et al. (2019a)
Kenli	Kenli	SPM	2015-08-04	680	0.29	-23.5	-351	0.65	3410	0.504	0.102	0.403	0.103	0.094	0.039	0.717439	2667.49	Yu et al. (2019a)
Kenli	Kenli	SPM	2015-11-24	190	0.12	-24.3	-429	0.58	4438	0.441	0.086	0.45	0.096	0.109	0.046	0.650954	3448.7	Yu et al. (2019a)
Kenli	Kenli	SPM	2016-01-21	260	0.35	-24.3	-439	0.57	4579	0.435	0.089	0.454	0.099	0.111	0.046	0.64117	3570.35	Yu et al. (2019a)
Kenli	Kenli	SPM	2016-07-05	180	0.75	-24.9	-304	0.7	2847	0.552	0.108	0.356	0.101	0.092	0.039	0.770925	2089.9	Yu et al. (2019a)
TGD13-13	Toudaoguai	SPM	2013-03-23	1100	0.49	-25	-424	0.58	4376									Qu et al. (2020)
TDG13-25	Toudaoguai	SPM	2013-06-05	2230	0.44	-24.9	-414	0.59	4238									Qu et al. (2020)
TDG13-29	Toudaoguai	SPM	2013-06-30	1180	1.06	-25.8	-563	0.44	6595									Qu et al. (2020)
TDG13-34	Toudaoguai	SPM	2013-07-26	1250	0.46	-24.4	-454	0.55	4802									Qu et al. (2020)
TDG13-35	Toudaoguai	SPM	2013-08-02	1280	0.46	-24.1	-434	0.57	4516									Qu et al. (2020)
TDG13-39	Toudaoguai	SPM	2013-08-30	2680	0.39	-24.3	-474	0.53	5100									Qu et al. (2020)
TDG13-40	Toudaoguai	SPM	2013-09-06	1990	0.47	-25	-454	0.55	4802									Qu et al. (2020)
TDG13-42	Toudaoguai	SPM	2013-09-20	1440	0.45	-24.3	-395	0.61	3971									Qu et al. (2020)
TDG13-44	Toudaoguai	SPM	2013-10-04	1270	0.49	-24.3	-424	0.58	4376									Qu et al. (2020)
TDG13-46	Toudaoguai	SPM	2013-10-18	1050	0.52	-24.4	-414	0.59	4238									Qu et al. (2020)
LM13-5	Longmen	SPM	2013-02-02	310	1.12	-25.8	-682	0.32	9153									Qu et al. (2020)
LM13-9	Longmen	SPM	2013-03-02	310	1.33	-21.9	-454	0.55	4802									Qu et al. (2020)
LM13-13	Longmen	SPM	2013-03-30	6030	0.61	-24.7	-424	0.58	4376									Qu et al. (2020)
LM13-22	Longmen	SPM	2013-06-01	150	1.88	-26.7	-405	0.6	4103									Qu et al. (2020)
LM13-28	Longmen	SPM	2013-07-08	1870	0.5	-24.8	-534	0.47	6065									Qu et al. (2020)
LM13-29	Longmen	SPM	2013-07-12	31160	0.16	-24.4	-613	0.39	7564									Qu et al. (2020)
LM13-31	Longmen	SPM	2013-07-22	13230	0.42	-24.7	-424	0.58	4376									Qu et al. (2020)
LM13-32	Longmen	SPM	2013-07-23	68160	0.37	-25.1	-295	0.71	2751									Qu et al. (2020)
LM13-33	Longmen	SPM	2013-07-24	3600	0.43	-24.3	-484	0.52	5253									Qu et al. (2020)
LM13-34	Longmen	SPM	2013-07-25	68990	0.41	-24.6	-295	0.71	2751									Qu et al. (2020)
LM13-37	Longmen	SPM	2013-08-12	14940	0.29	-24.3	-454	0.55	4802									Qu et al. (2020)
LM13-41	Longmen	SPM	2013-09-04	3480	0.45	-24.2	-414	0.59	4238									Qu et al. (2020)
LM13-43	Longmen	SPM	2013-09-11	4680	0.39	-24.9	-454	0.55	4802									Qu et al. (2020)
2017 TDG-1	Toudaoguai	Bedload	2017-09-01		0.17	-23.5	-583	0.42	6969									Qu et al. (2020)
2017 LM	Longmen	Bedload	2017-09-01		0.1	-24.5	-812	0.19	13341									Qu et al. (2020)
2017 TG	Tongguan	Bedload	2017-09-01		0.17	-25.7	-673	0.33	8906									Qu et al. (2020)
2016 LM	Longmen	Bedload	2016-09-01		0.07	-25.1	-782	0.22	12163									Qu et al. (2020)
2016 TDG	Toudaoguai	Bedload	2016-09-01		0.17	-24.4	-504	0.5	5568									Qu et al. (2020)
