# Supplementary material for: Channel cross-section heterogeneity of particulate organic carbon transport in the Huanghe
Source: Copernicus journal article supplement (doi:10.5194/esurf-12-347-2024), 2024-02-15
Supplement: Supplementary file 2 [file Table_S2.xlsx]

## Sheet: Sheet1
Table S2. Relative contributions of the three different sources of POC at the Luokou cross-section
Sample ID	Fractional proportions						OC content (%)
	OCts	SD	OClps	SD	OCpetro	SD	OCbio	SD	OCpetro	SD
JB 1-1	0.524	0.089	0.368	0.089	0.108	0.043	0.39248	0.056842	0.04752	0.0190429
JB 1-2	0.499	0.084	0.386	0.089	0.115	0.046	0.39825	0.0554314	0.05175	0.0207319
JB 1-3	0.554	0.095	0.345	0.093	0.101	0.042	0.35061	0.0522571	0.03939	0.0164111
JB 2-1	0.518	0.086	0.371	0.089	0.111	0.045	0.3556	0.0530668	0.0444	0.0183054
JB 2-2	0.478	0.077	0.388	0.088	0.134	0.054	0.27712	0.0379212	0.04288	0.0173319
JB 2-3	0.466	0.075	0.394	0.09	0.139	0.06	0.2494	0.0345183	0.04031	0.0174554
JB 3-1	0.482	0.078	0.395	0.09	0.124	0.052	0.28064	0.0400971	0.03968	0.0168238
JB 3-2	0.498	0.077	0.373	0.088	0.128	0.052	0.27001	0.0383253	0.03968	0.016322
JB 4-1	0.511	0.087	0.379	0.09	0.11	0.045	0.3649	0.0528759	0.0451	0.0185807
JB 5-1	0.487	0.08	0.388	0.09	0.124	0.052	0.28	0.039033	0.03968	0.0166861
HH 17.05	0.575	0.107	0.333	0.099	0.093	0.039	0.83536	0.134112	0.08556	0.03588
HH 17.06	0.585	0.112	0.326	0.102	0.089	0.038	1.10231	0.18342	0.10769	0.0459886
HH	0.07	0.03	0.208	0.097	0.722	0.1	0.05838	0.0223153	0.15162	0.0301688
