# Supplementary material for: Channel cross-section heterogeneity of particulate organic carbon transport in the Huanghe
Source: Copernicus journal article supplement (doi:10.5194/esurf-12-347-2024), 2024-02-15
Supplement: Supplementary file [file esurf-12-347-2024-supplement-title-page.pdf › esurf-12-347-2024-supplement-title-page.pdf]

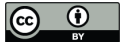

## *Supplement of*

# **Channel cross-section heterogeneity of particulate organic carbon transport in the Huanghe**

**Yutian Ke et al.**

*Correspondence to:* Yutian Ke ([yutianke@caltech.edu](mailto:yutianke@caltech.edu))

- esurf-12-347-2024-supplement-title-page.pdf
- \_\_MACOSX
  - .\_egusphere-2023-1045-supplement-version5
  - egusphere-2023-1045-supplement-version5
    - \* .\_E-Surf SI final.pdf
    - \* .\_Table\_S1.xlsx
    - \* .\_Table\_S2.xlsx
- egusphere-2023-1045-supplement-version5
  - E-Surf SI final.pdf
  - Table\_S1.xlsx
  - Table\_S2.xlsx

The copyright of individual parts of the supplement might differ from the article licence.
